# Supplementary material for: ROAST: rotation gene set tests for complex microarray experiments
Source: PubMed Central journal article supplement — Bioinformatics. 2010 Jul 7;26(17):2176–82. doi: 10.1093/bioinformatics/btq401 (PMC2922896; doi:10.1093/bioinformatics/btq401), 2010-07-07
Supplement: supp_btq401_TableS1-6.pdf [file supp_btq401_TableS1-6.pdf]

Table S1  
 Size, normal distributed data (40 genes in a set),  
 for design D1-3

| scenario       | Cutoff P value | mean   | msq    | mean50 | floormean |
|----------------|----------------|--------|--------|--------|-----------|
| Up             | 0.001          | 0.001  | 0.0013 | 0.0007 | 0.0007    |
|                | 0.005          | 0.0037 | 0.0033 | 0.0023 | 0.002     |
|                | 0.01           | 0.0087 | 0.007  | 0.0053 | 0.0057    |
|                | 0.03           | 0.0263 | 0.024  | 0.023  | 0.0217    |
|                | 0.05           | 0.044  | 0.046  | 0.041  | 0.0403    |
| Up<br>cor 0.1  | 0.001          | 0.0013 | 0.0013 | 0.0013 | 0.0013    |
|                | 0.005          | 0.006  | 0.0047 | 0.005  | 0.0047    |
|                | 0.01           | 0.0113 | 0.0103 | 0.0107 | 0.0107    |
|                | 0.03           | 0.032  | 0.032  | 0.0313 | 0.0327    |
|                | 0.05           | 0.0527 | 0.0483 | 0.0527 | 0.052     |
| Mix            | 0.001          | 0.0003 | 0.0003 | 0.0007 | 0.0007    |
|                | 0.005          | 0.0023 | 0.0033 | 0.005  | 0.004     |
|                | 0.01           | 0.0087 | 0.0087 | 0.0087 | 0.01      |
|                | 0.03           | 0.027  | 0.03   | 0.0307 | 0.031     |
|                | 0.05           | 0.0403 | 0.0503 | 0.051  | 0.0543    |
| Mix<br>cor 0.1 | 0.001          | 0.0007 | 0.001  | 0.001  | 0.0007    |
|                | 0.005          | 0.0047 | 0.004  | 0.0047 | 0.0043    |
|                | 0.01           | 0.009  | 0.01   | 0.01   | 0.01      |
|                | 0.03           | 0.032  | 0.0317 | 0.031  | 0.039     |
|                | 0.05           | 0.0507 | 0.0497 | 0.0483 | 0.047     |

2999 rotations were in ROAST. 3000 simulations were run.

Table S2  
 Size, exp distributed data (40 genes in a set),  
 for design D1-3

| scenario      | Cutoff P value | mean   | msq    | mean50 | floormean |
|---------------|----------------|--------|--------|--------|-----------|
| Up            | 0.001          | 0.0009 | 0.002  | 0.0009 | 0.0008    |
|               | 0.005          | 0.0044 | 0.0089 | 0.0051 | 0.0044    |
|               | 0.01           | 0.0091 | 0.0162 | 0.0099 | 0.0095    |
|               | 0.03           | 0.0288 | 0.0422 | 0.0307 | 0.0301    |
|               | 0.05           | 0.0502 | 0.068  | 0.0499 | 0.0483    |
| Up<br>cor0.1  | 0.001          | 0.0021 | 0.0021 | 0.0018 | 0.002     |
|               | 0.005          | 0.0053 | 0.009  | 0.0072 | 0.0067    |
|               | 0.01           | 0.0098 | 0.0158 | 0.013  | 0.0112    |
|               | 0.03           | 0.0305 | 0.0399 | 0.0356 | 0.0319    |
|               | 0.05           | 0.0495 | 0.0632 | 0.0538 | 0.0495    |
| Mix           | 0.001          | 0.0014 | 0.0034 | 0.003  | 0.0036    |
|               | 0.005          | 0.006  | 0.0126 | 0.0093 | 0.0112    |
|               | 0.01           | 0.0106 | 0.0203 | 0.0169 | 0.0195    |
|               | 0.03           | 0.0303 | 0.0484 | 0.0426 | 0.0478    |
|               | 0.05           | 0.0483 | 0.0746 | 0.065  | 0.0739    |
| Mix<br>cor0.1 | 0.001          | 0.002  | 0.0032 | 0.0027 | 0.0025    |
|               | 0.005          | 0.0078 | 0.0123 | 0.0102 | 0.0104    |
|               | 0.01           | 0.0132 | 0.0226 | 0.0183 | 0.0199    |
|               | 0.03           | 0.0408 | 0.0545 | 0.0482 | 0.0522    |
|               | 0.05           | 0.0627 | 0.0813 | 0.0736 | 0.0795    |

2999 rotations were in ROAST. 3000 simulations were run.

Table S3  
 Power, normal distributed data (40 genes in a set),  
 for design D1-3

| scenario | Cutoff P value | mean  | msq   | mean50 | floormean |
|----------|----------------|-------|-------|--------|-----------|
| 1        | 0.002          | 0.396 | 0.186 | 0.244  | 0.304     |
|          | 0.005          | 0.542 | 0.320 | 0.383  | 0.451     |
|          | 0.01           | 0.645 | 0.421 | 0.484  | 0.568     |
|          | 0.03           | 0.804 | 0.610 | 0.693  | 0.738     |
|          | 0.05           | 0.862 | 0.691 | 0.783  | 0.810     |
| 2        | 0.002          | 0.269 | 0.273 | 0.277  | 0.284     |
|          | 0.005          | 0.416 | 0.415 | 0.430  | 0.431     |
|          | 0.01           | 0.535 | 0.529 | 0.542  | 0.547     |
|          | 0.03           | 0.708 | 0.695 | 0.697  | 0.709     |
|          | 0.05           | 0.777 | 0.771 | 0.786  | 0.794     |
| 3        | 0.002          | 0.183 | 0.330 | 0.309  | 0.296     |
|          | 0.005          | 0.278 | 0.464 | 0.432  | 0.412     |
|          | 0.01           | 0.373 | 0.563 | 0.543  | 0.517     |
|          | 0.03           | 0.554 | 0.725 | 0.707  | 0.694     |
|          | 0.05           | 0.657 | 0.800 | 0.793  | 0.776     |
| 4        | 0.002          | 0.280 | 0.597 | 0.508  | 0.446     |
|          | 0.005          | 0.407 | 0.728 | 0.657  | 0.595     |
|          | 0.01           | 0.531 | 0.799 | 0.753  | 0.727     |
|          | 0.03           | 0.708 | 0.891 | 0.878  | 0.860     |
|          | 0.05           | 0.787 | 0.918 | 0.920  | 0.913     |
| 5        | 0.002          | 0.537 | 0.512 | 0.534  | 0.524     |
|          | 0.005          | 0.683 | 0.651 | 0.664  | 0.650     |
|          | 0.01           | 0.766 | 0.737 | 0.740  | 0.729     |
|          | 0.03           | 0.872 | 0.854 | 0.864  | 0.844     |
|          | 0.05           | 0.907 | 0.903 | 0.903  | 0.899     |
| 6        | 0.002          | 0.200 | 0.200 | 0.204  | 0.199     |
|          | 0.005          | 0.316 | 0.320 | 0.317  | 0.323     |
|          | 0.01           | 0.418 | 0.421 | 0.415  | 0.417     |
|          | 0.03           | 0.596 | 0.583 | 0.593  | 0.584     |
|          | 0.05           | 0.671 | 0.657 | 0.664  | 0.662     |
| 7        | 0.002          | 0.299 | 0.395 | 0.380  | 0.382     |
|          | 0.005          | 0.425 | 0.512 | 0.504  | 0.504     |
|          | 0.01           | 0.520 | 0.601 | 0.591  | 0.597     |
|          | 0.03           | 0.695 | 0.760 | 0.744  | 0.740     |
|          | 0.05           | 0.767 | 0.817 | 0.803  | 0.813     |
| 8        | 0.002          | 0.604 | 0.707 | 0.698  | 0.691     |
|          | 0.005          | 0.728 | 0.804 | 0.804  | 0.806     |
|          | 0.01           | 0.812 | 0.859 | 0.854  | 0.862     |
|          | 0.03           | 0.897 | 0.925 | 0.917  | 0.918     |
|          | 0.05           | 0.925 | 0.947 | 0.941  | 0.940     |

999 rotations were in ROAST. 1000 simulations were run.

Table S4  
 Size, norm distributed data (1000 genes in a set),  
 for design D1-3

| scenario      | Cutoff P value | mean   | msq    | mean50 | floormean |
|---------------|----------------|--------|--------|--------|-----------|
| Up            | 0.001          | 0.0023 | 0.0023 | 0.002  | 0.0017    |
|               | 0.005          | 0.01   | 0.0086 | 0.0077 | 0.007     |
|               | 0.01           | 0.014  | 0.0137 | 0.0157 | 0.017     |
|               | 0.03           | 0.0333 | 0.035  | 0.0357 | 0.036     |
|               | 0.05           | 0.0523 | 0.0557 | 0.0567 | 0.057     |
| Up<br>cor0.1  | 0.001          | 0.001  | 0.0013 | 0.0013 | 0.001     |
|               | 0.005          | 0.0037 | 0.0033 | 0.0033 | 0.0037    |
|               | 0.01           | 0.0009 | 0.0103 | 0.0103 | 0.01      |
|               | 0.03           | 0.0277 | 0.027  | 0.0267 | 0.0273    |
|               | 0.05           | 0.0527 | 0.0493 | 0.0517 | 0.051     |
| Mix           | 0.001          | 0.0017 | 0.0013 | 0.0007 | 0.0007    |
|               | 0.005          | 0.004  | 0.0053 | 0.004  | 0.0047    |
|               | 0.01           | 0.0087 | 0.0087 | 0.0087 | 0.011     |
|               | 0.03           | 0.026  | 0.032  | 0.029  | 0.03      |
|               | 0.05           | 0.0437 | 0.0507 | 0.0493 | 0.0513    |
| Mix<br>cor0.1 | 0.001          | 0.0007 | 0.0007 | 0.0007 | 0.0007    |
|               | 0.005          | 0.003  | 0.0033 | 0.003  | 0.003     |
|               | 0.01           | 0.0077 | 0.007  | 0.0077 | 0.008     |
|               | 0.03           | 0.0263 | 0.0273 | 0.0273 | 0.0277    |
|               | 0.05           | 0.0453 | 0.0447 | 0.0437 | 0.045     |

2999 rotations were in ROAST. 3000 simulations were run.

Table S5  
 Power, normal distributed data (1000 genes in a set),  
 for design D1-3

| scenario | Cutoff P value | mean  | msq   | mean50 | floormean |
|----------|----------------|-------|-------|--------|-----------|
| 1        | 0.002          | 0.356 | 0.126 | 0.212  | 0.227     |
|          | 0.005          | 0.527 | 0.213 | 0.338  | 0.358     |
|          | 0.01           | 0.639 | 0.294 | 0.445  | 0.47      |
|          | 0.03           | 0.801 | 0.514 | 0.647  | 0.66      |
|          | 0.05           | 0.857 | 0.623 | 0.755  | 0.763     |
| 2        | 0.002          | 0.364 | 0.395 | 0.401  | 0.384     |
|          | 0.005          | 0.512 | 0.55  | 0.556  | 0.534     |
|          | 0.01           | 0.639 | 0.67  | 0.684  | 0.661     |
|          | 0.03           | 0.811 | 0.838 | 0.839  | 0.836     |
|          | 0.05           | 0.873 | 0.895 | 0.896  | 0.893     |
| 3        | 0.002          | 0.258 | 0.148 | 0.199  | 0.214     |
|          | 0.005          | 0.388 | 0.233 | 0.316  | 0.326     |
|          | 0.01           | 0.51  | 0.329 | 0.453  | 0.465     |
|          | 0.03           | 0.707 | 0.512 | 0.653  | 0.666     |
|          | 0.05           | 0.787 | 0.625 | 0.735  | 0.742     |
| 4        | 0.002          | 0.303 | 0.364 | 0.346  | 0.338     |
|          | 0.005          | 0.46  | 0.522 | 0.51   | 0.501     |
|          | 0.01           | 0.577 | 0.641 | 0.625  | 0.62      |
|          | 0.03           | 0.751 | 0.808 | 0.808  | 0.799     |
|          | 0.05           | 0.832 | 0.864 | 0.859  | 0.858     |
| 5        | 0.002          | 0.219 | 0.222 | 0.231  | 0.213     |
|          | 0.005          | 0.34  | 0.332 | 0.334  | 0.309     |
|          | 0.01           | 0.435 | 0.433 | 0.443  | 0.414     |
|          | 0.03           | 0.599 | 0.61  | 0.616  | 0.588     |
|          | 0.05           | 0.7   | 0.681 | 0.698  | 0.663     |
| 6        | 0.002          | 0.318 | 0.326 | 0.327  | 0.329     |
|          | 0.005          | 0.457 | 0.464 | 0.464  | 0.466     |
|          | 0.01           | 0.558 | 0.56  | 0.563  | 0.566     |
|          | 0.03           | 0.753 | 0.75  | 0.751  | 0.745     |
|          | 0.05           | 0.838 | 0.835 | 0.837  | 0.835     |
| 7        | 0.002          | 0.119 | 0.111 | 0.117  | 0.104     |
|          | 0.005          | 0.187 | 0.198 | 0.201  | 0.176     |
|          | 0.01           | 0.256 | 0.288 | 0.284  | 0.275     |
|          | 0.03           | 0.27  | 0.462 | 0.467  | 0.441     |
|          | 0.05           | 0.536 | 0.555 | 0.559  | 0.542     |
| 8        | 0.002          | 0.289 | 0.298 | 0.299  | 0.295     |
|          | 0.005          | 0.429 | 0.44  | 0.44   | 0.439     |
|          | 0.01           | 0.547 | 0.546 | 0.549  | 0.548     |
|          | 0.03           | 0.714 | 0.723 | 0.725  | 0.724     |
|          | 0.05           | 0.793 | 0.787 | 0.797  | 0.788     |

999 rotations were in ROAST. 1000 simulations were run.

Table S6  
Power, normal distributed data, 1 factor (40 genes in a set),  
for design D1-5

| scenario | Cutoff P value | mean | msq  | mean50 | floormean | GSEAlm |
|----------|----------------|------|------|--------|-----------|--------|
| 1        | 0.002          | 0.59 | 0.33 | 0.4    | 0.48      | 0.35   |
|          | 0.005          | 0.72 | 0.47 | 0.58   | 0.63      | 0.35   |
|          | 0.01           | 0.81 | 0.58 | 0.67   | 0.75      | 0.68   |
|          | 0.03           | 0.9  | 0.73 | 0.83   | 0.85      | 0.88   |
|          | 0.05           | 0.94 | 0.86 | 0.87   | 0.91      | 0.93   |
| 2        | 0.002          | 0.53 | 0.54 | 0.56   | 0.56      | 0.45   |
|          | 0.005          | 0.72 | 0.7  | 0.7    | 0.74      | 0.45   |
|          | 0.01           | 0.8  | 0.76 | 0.76   | 0.81      | 0.67   |
|          | 0.03           | 0.94 | 0.92 | 0.94   | 0.92      | 0.86   |
|          | 0.05           | 0.97 | 0.97 | 0.97   | 0.97      | 0.95   |
| 3        | 0.002          | 0.26 | 0.66 | 0.56   | 0.49      | 0.32   |
|          | 0.005          | 0.39 | 0.73 | 0.71   | 0.63      | 0.32   |
|          | 0.01           | 0.55 | 0.82 | 0.8    | 0.77      | 0.5    |
|          | 0.03           | 0.76 | 0.91 | 0.92   | 0.9       | 0.72   |
|          | 0.05           | 0.86 | 0.95 | 0.94   | 0.94      | 0.81   |
| 4        | 0.002          | 0.49 | 0.89 | 0.87   | 0.77      | 0.42   |
|          | 0.005          | 0.7  | 0.94 | 0.9    | 0.89      | 0.42   |
|          | 0.01           | 0.79 | 0.95 | 0.93   | 0.91      | 0.68   |
|          | 0.03           | 0.92 | 0.99 | 0.98   | 0.96      | 0.82   |
|          | 0.05           | 0.96 | 0.99 | 0.99   | 0.98      | 0.95   |

999 rotations were in ROAST. 125 permutations were in GSEAlm. 100 simulations were run.
