# Supplementary material for: ROAST: rotation gene set tests for complex microarray experiments
Source: PubMed Central journal article supplement — Bioinformatics. 2010 Jul 7;26(17):2176–82. doi: 10.1093/bioinformatics/btq401 (PMC2922896; doi:10.1093/bioinformatics/btq401), 2010-07-07
Supplement: supp_btq401_TableS7-8.pdf [file supp_btq401_TableS7-8.pdf]

Table S7  
Power when there are two factors (Normal, 40 genes in a set), for design D2-5

5 samples per group

| logFC           |      |     |                | 100% |      |        |           |        | 25%  |      |        |           |        |
|-----------------|------|-----|----------------|------|------|--------|-----------|--------|------|------|--------|-----------|--------|
| Factor1 (major) | F2   | Cor | Cutoff P value | mean | msq  | mean50 | floormean | GSEAlm | mean | msq  | mean50 | floormean | GSEAlm |
| 0.06            | 0.01 | 0   | 0.002          | 0.4  | 0.17 | 0.21   | 0.27      | 0.63   | 0.1  | 0.14 | 0.12   | 0.12      | 0.2    |
|                 |      |     | 0.005          | 0.64 | 0.24 | 0.33   | 0.5       | 0.63   | 0.16 | 0.3  | 0.26   | 0.15      | 0.2    |
|                 |      |     | 0.01           | 0.7  | 0.37 | 0.5    | 0.57      | 0.74   | 0.25 | 0.36 | 0.37   | 0.3       | 0.32   |
|                 |      |     | 0.03           | 0.85 | 0.66 | 0.81   | 0.84      | 0.84   | 0.48 | 0.6  | 0.59   | 0.53      | 0.45   |
|                 |      |     | 0.05           | 0.89 | 0.73 | 0.83   | 0.87      | 0.91   | 0.52 | 0.73 | 0.69   | 0.66      | 0.63   |
| 0.06            | 0.06 | 0   | 0.002          | 0.43 | 0.23 | 0.28   | 0.34      | 0.73   | 0.31 | 0.51 | 0.51   | 0.43      | 0.42   |
|                 |      |     | 0.005          | 0.66 | 0.31 | 0.46   | 0.57      | 0.73   | 0.42 | 0.68 | 0.64   | 0.63      | 0.42   |
|                 |      |     | 0.01           | 0.79 | 0.5  | 0.6    | 0.69      | 0.82   | 0.58 | 0.77 | 0.75   | 0.71      | 0.57   |
|                 |      |     | 0.03           | 0.91 | 0.7  | 0.77   | 0.82      | 0.86   | 0.73 | 0.87 | 0.82   | 0.82      | 0.74   |
|                 |      |     | 0.05           | 0.93 | 0.73 | 0.85   | 0.9       | 0.91   | 0.78 | 0.93 | 0.91   | 0.89      | 0.85   |
| 0.15            | 0.03 | 0.1 | 0.002          | 0.61 | 0.62 | 0.55   | 0.63      | 0.79   | 0.08 | 0.23 | 0.19   | 0.17      | 0.24   |
|                 |      |     | 0.005          | 0.76 | 0.72 | 0.76   | 0.77      | 0.79   | 0.15 | 0.3  | 0.3    | 0.27      | 0.24   |
|                 |      |     | 0.01           | 0.84 | 0.85 | 0.85   | 0.85      | 0.9    | 0.24 | 0.41 | 0.39   | 0.39      | 0.32   |
|                 |      |     | 0.03           | 0.96 | 0.95 | 0.95   | 0.96      | 0.96   | 0.41 | 0.57 | 0.51   | 0.51      | 0.41   |
|                 |      |     | 0.05           | 0.98 | 0.97 | 0.97   | 0.98      | 0.99   | 0.48 | 0.62 | 0.61   | 0.56      | 0.51   |
| 0.15            | 0.15 | 0.1 | 0.002          | 0.52 | 0.58 | 0.58   | 0.55      | 0.69   | 0.23 | 0.48 | 0.4    | 0.37      | 0.39   |
|                 |      |     | 0.005          | 0.73 | 0.74 | 0.74   | 0.72      | 0.69   | 0.28 | 0.59 | 0.51   | 0.48      | 0.39   |
|                 |      |     | 0.01           | 0.82 | 0.84 | 0.83   | 0.82      | 0.84   | 0.37 | 0.66 | 0.6    | 0.57      | 0.5    |
|                 |      |     | 0.03           | 0.91 | 0.91 | 0.91   | 0.92      | 0.9    | 0.63 | 0.79 | 0.79   | 0.75      | 0.69   |
|                 |      |     | 0.05           | 0.94 | 0.94 | 0.94   | 0.93      | 0.96   | 0.69 | 0.87 | 0.83   | 0.84      | 0.77   |

999 rotations were in ROAST. 125 permutations were in GSEAlm. 100 simulations were run.

“%” represents percentage of up regulated genes in the set.

Table S8  
Power when there are two factors (Normal, 40 genes in a set), for design D2-3

3 samples per group

| logFC              |      |     |                   | 100% |      |        |           |        | 25%  |      |        |           |        |
|--------------------|------|-----|-------------------|------|------|--------|-----------|--------|------|------|--------|-----------|--------|
| Factor1<br>(major) | F2   | Cor | Cutoff<br>P value | mean | msq  | mean50 | floormean | GSEAlm | mean | msq  | mean50 | floormean | GSEAlm |
| 0.06               | 0.01 | 0   | 0.002             | 0.13 | 0.04 | 0.06   | 0.07      | 0.16   | 0.16 | 0.22 | 0.21   | 0.18      | 0.21   |
|                    |      |     | 0.005             | 0.22 | 0.12 | 0.15   | 0.19      | 0.16   | 0.2  | 0.33 | 0.32   | 0.28      | 0.21   |
|                    |      |     | 0.01              | 0.32 | 0.2  | 0.26   | 0.28      | 0.34   | 0.26 | 0.4  | 0.41   | 0.39      | 0.35   |
|                    |      |     | 0.03              | 0.53 | 0.36 | 0.44   | 0.47      | 0.48   | 0.44 | 0.6  | 0.57   | 0.61      | 0.48   |
|                    |      |     | 0.05              | 0.69 | 0.44 | 0.5    | 0.54      | 0.7    | 0.56 | 0.68 | 0.69   | 0.68      | 0.63   |
| 0.06               | 0.06 | 0   | 0.002             | 0.12 | 0.03 | 0.03   | 0.07      | 0.19   | 0.23 | 0.61 | 0.57   | 0.5       | 0.38   |
|                    |      |     | 0.005             | 0.24 | 0.08 | 0.1    | 0.14      | 0.19   | 0.45 | 0.81 | 0.75   | 0.68      | 0.38   |
|                    |      |     | 0.01              | 0.36 | 0.16 | 0.19   | 0.29      | 0.4    | 0.65 | 0.88 | 0.82   | 0.78      | 0.7    |
|                    |      |     | 0.03              | 0.57 | 0.38 | 0.42   | 0.51      | 0.54   | 0.78 | 0.94 | 0.93   | 0.92      | 0.79   |
|                    |      |     | 0.05              | 0.72 | 0.44 | 0.53   | 0.64      | 0.73   | 0.84 | 0.96 | 0.95   | 0.94      | 0.86   |
| 0.15               | 0.03 | 0.1 | 0.002             | 0.38 | 0.45 | 0.44   | 0.45      | 0.45   | 0.06 | 0.13 | 0.14   | 0.1       | 0.12   |
|                    |      |     | 0.005             | 0.56 | 0.64 | 0.64   | 0.65      | 0.45   | 0.12 | 0.17 | 0.18   | 0.17      | 0.12   |
|                    |      |     | 0.01              | 0.78 | 0.79 | 0.81   | 0.83      | 0.75   | 0.15 | 0.26 | 0.27   | 0.24      | 0.27   |
|                    |      |     | 0.03              | 0.92 | 0.91 | 0.92   | 0.93      | 0.91   | 0.35 | 0.4  | 0.44   | 0.39      | 0.4    |
|                    |      |     | 0.05              | 0.95 | 0.95 | 0.95   | 0.96      | 0.94   | 0.45 | 0.58 | 0.53   | 0.54      | 0.58   |
| 0.15               | 0.15 | 0.1 | 0.002             | 0.46 | 0.44 | 0.42   | 0.47      | 0.44   | 0.19 | 0.51 | 0.44   | 0.31      | 0.43   |
|                    |      |     | 0.005             | 0.66 | 0.68 | 0.64   | 0.7       | 0.44   | 0.37 | 0.65 | 0.61   | 0.54      | 0.43   |
|                    |      |     | 0.01              | 0.79 | 0.84 | 0.82   | 0.83      | 0.79   | 0.53 | 0.76 | 0.67   | 0.65      | 0.56   |
|                    |      |     | 0.03              | 0.93 | 0.94 | 0.94   | 0.95      | 0.94   | 0.66 | 0.87 | 0.84   | 0.82      | 0.7    |
|                    |      |     | 0.05              | 0.96 | 0.96 | 0.96   | 0.96      | 0.98   | 0.77 | 0.9  | 0.91   | 0.88      | 0.84   |

999 rotations were in ROAST. 125 permutations were in GSEAlm. 100 simulations were run.

“%” represents percentage of up regulated genes in the set.
